# Supplementary material for: General approach to a spiro indole-3,1′-naphthalene tetracyclic system: stereoselective pseudo four-component reaction of isatins and cyclic ketones with two molecules of malononitrile
Source: Royal Society of Chemistry journal article supplement (doi:10.1039/c5ra03452c), 2015-01-01
Supplement: c5ra03452c1.pdf [file c5ra03452c1.pdf]

Supporting information for

## General Approach to Spiro Indole-3,1'-naphthalen Tetracyclic System: Stereoselective Pseudo Four-component Reaction of Isatins and Cyclic Carbonyl Compounds with two Molecules of Malononitrile

Michail N. Elinson<sup>a,\*</sup>, Anatoly N. Vereshchagin<sup>a</sup>, Ruslan F. Nasybullin<sup>a</sup>, Sergey I. Bobrovsky<sup>a</sup>,  
Alexey I. Ilovaisky<sup>a</sup>, Valentina M. Merkulova<sup>a</sup>, Ivan S. Bushmarinov<sup>b</sup>, Mikhail P. Egorov<sup>a</sup>

*N. D. Zelinsky Institute of Organic Chemistry, Leninsky prospect 47, 119991 Moscow, Russia*

*E-mail: [elinson@ioc.ac.ru](mailto:elinson@ioc.ac.ru)*

### 1. General Information

All melting points were measured with a Gallenkamp melting point apparatus and are uncorrected. <sup>1</sup>H and <sup>13</sup>C NMR spectra were recorded with a Bruker Avance II-300 spectrometer at ambient temperature in DMSO-*d*<sub>6</sub> solutions. Chemical shifts values are given in  $\delta$  scale relative to Me<sub>4</sub>Si. IR spectra were registered with a Bruker ALPHA-T FT-IR spectrometer in KBr pellets. Mass-spectra (EI = 70 eV) were obtained directly with a Finningan MAT INCOS 50 spectrometer. All starting materials were obtained from commercial sources and used without purification.

### 2. General Multicomponent Procedure

A mixture of isatin **1** (1 mmol), cyclic ketone **2** (1 mmol), malononitrile (0.132g, 2 mmol), Et<sub>3</sub>N (0.02 g, 0.2 mmol) and ethanol (3 mL) was magnetically stirred at 20 °C for 1.5-2 h until deep red color of isatilydene malononitrile **4** was disappeared. Then the reaction mixture was filtered to isolate the solid products **3a-p**, which were then rinsed with ice-cold ethanol (2×2 mL) and dried under reduced pressure.

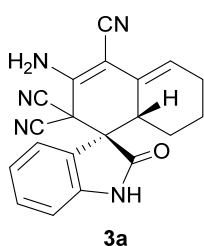

**(3R\*,8a'R\*)-3'-Amino-2-oxo-1,2,6',8',8a'-hexahydro-2'H-spiro[indole-3,1'-naphthalene]-2',2',4'-tricarbonitrile (3a)** (known compound, see: T. H. Babu, A. A. Joseph, D. Muralidharan and P. T. Perumal, *Tetrahedron Lett.*, 2010, **51**, 994): white solid; yield 0.29 g (85%); mp 271–273 °C (lit. mp 238–240 °C); <sup>1</sup>H NMR (300 MHz, DMSO-*d*<sub>6</sub>): 0.46 (q, *J* = 11.7 Hz, 1H), 1.36–1.71 (m, 3H),

1.81–1.99 (m, 1H), 2.07–2.27 (m, 1H), 2.83–2.97 (m, 1H), 5.86–5.97 (m, 1H), 6.87 (d,  $J = 7.7$  Hz, 1H, Ar), 7.00 (d,  $J = 7.7$  Hz, 1H, Ar), 7.06 (t,  $J = 7.7$  Hz, 1H, Ar), 7.37 (t,  $J = 7.7$  Hz, 1H, Ar), 7.53 (s, 2H, NH<sub>2</sub>), 11.36 (s, 1H, NH) ppm; <sup>13</sup>C NMR (75 MHz, DMSO-*d*<sub>6</sub>): 20.2, 23.4, 24.5, 37.0, 42.2, 54.6, 81.6, 110.2, 110.6, 110.7, 115.5, 122.5, 122.9, 123.7, 125.0, 125.4, 130.8, 142.3, 142.9, 173.3 ppm; IR (KBr):  $\nu = 3416, 3328, 3223, 2944, 2221, 1749, 1728, 1656, 1596, 1471$  cm<sup>-1</sup>; MS (EI):  $m/z$  (%) = 341 ([M]<sup>+</sup>, 100), 324 (25), 313 (21), 297 (15), 285 (13), 230 (11), 209 (10), 170 (10), 133 (28), 77 (13); Anal. calcd (%) for C<sub>20</sub>H<sub>15</sub>N<sub>5</sub>O: C 70.37, H 4.43, N 20.52. Found (%): C 70.23, H 4.57, N 20.40.

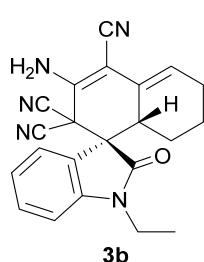

**(3R\*,8a'R\*)-3'-Amino-1-ethyl-2-oxo-1,2,6',7',8',8a'-hexahydro-2'H-spiro[indole-3,1'-naphthalene]-2',2',4'-tricarbonitrile (3b):** white solid. Yield

0.32 g (86%); mp 268–269 °C; <sup>1</sup>H NMR (300 MHz, DMSO-*d*<sub>6</sub>)  $\delta$  0.40 (q,  $J = 12.1$  Hz, 1H), 1.18 (t,  $J = 7.0$  Hz, 3H, CH<sub>3</sub>), 1.37–1.55 (m, 2H), 1.55–1.68 (m, 1H), 1.81–1.99 (m, 1H), 2.08–2.22 (m, 1H), 2.90–3.02 (m, 1H), 3.79–3.93 (m,

2H, CH<sub>2</sub>), 5.89–5.98 (m, 1H), 6.94 (d,  $J = 7.7$  Hz, 1H, Ar), 7.15 (t,  $J = 7.7$  Hz, 1H, Ar), 7.29 (d,  $J = 7.7$  Hz, 1H, Ar), 7.48 (t,  $J = 7.7$  Hz, 1H, Ar), 7.55 (s, 2H, NH<sub>2</sub>) ppm; <sup>13</sup>C NMR (75 MHz, DMSO-*d*<sub>6</sub>)  $\delta$  12.2, 20.2, 23.3, 24.5, 34.8, 37.0, 42.2, 54.0, 81.6, 109.8, 110.0, 110.6, 115.5, 122.0, 123.5, 123.8, 124.9, 125.3, 131.0, 142.2, 143.2, 171.2 ppm; IR (KBr):  $\nu = 3635, 3347, 3187, 2936, 2215, 1719, 1665, 1597, 1371$  cm<sup>-1</sup>; MS (EI):  $m/z$  (%) = 369 ([M]<sup>+</sup>, 17), 326 (5), 287 (4), 161 (32), 130 (25), 77 (27), 29 (100). Anal. calcd (%) for C<sub>22</sub>H<sub>19</sub>N<sub>5</sub>O: C 71.53, H 5.18, N 18.96. Found (%): C 71.27, H 5.25, N 18.78.

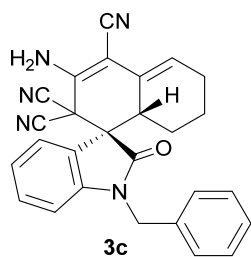

**(3R\*,8a'R\*)-3'-Amino-1-benzyl-2-oxo-1,2,6',7',8',8a'-hexahydro-2'H-spiro[indole-3,1'-naphthalene]-2',2',4'-tricarbonitrile (3c):** white solid.

Yield 0.39 g (90%); mp 243–245 °C; <sup>1</sup>H NMR (300 MHz, DMSO-*d*<sub>6</sub>)  $\delta$  0.38 (q,  $J = 12.1$  Hz, 1H), 1.37–1.67 (m, 3H), 1.78–1.98 (m, 1H), 2.06–2.24 (m, 1H), 2.94–3.07 (m, 1H), 4.99–5.13 (m, 2H, CH<sub>2</sub>), 5.89–5.99 (m,

1H), 6.95 (d,  $J = 7.3$  Hz, 1H, Ar), 7.10–7.20 (m, 2H, Ar), 7.24–7.47 (m, 6H, Ar), 7.58 (s, 2H, NH<sub>2</sub>) ppm; <sup>13</sup>C NMR (75 MHz, DMSO-*d*<sub>6</sub>)  $\delta$  20.2, 23.4, 24.5, 37.3, 42.2, 43.5, 54.2, 81.7, 110.2, 110.4, 110.6, 115.5, 121.8, 123.8, 124.0, 124.9, 125.2, 127.4 (2C), 127.8, 128.7 (2C), 131.0, 135.5, 142.2, 143.4, 171.9 ppm; IR (KBr):  $\nu = 3353, 3216, 2944, 2217, 1716, 1664, 1600, 1378$  cm<sup>-1</sup>; MS (EI):  $m/z$  (%) = 431 ([M]<sup>+</sup>, 13), 340 (5), 285 (4), 91 (100), 65 (18). Anal. calcd (%) for C<sub>27</sub>H<sub>21</sub>N<sub>5</sub>O: C 75.16, H 4.91, N 16.23. Found (%): C 74.97, H 5.02, N 16.11.

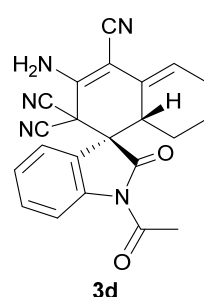

**(3R\*,8a'R\*)-1-Acetyl-3'-amino-2-oxo-1,2,6',7',8',8a'-hexahydro-2'H-spiro[indole-3,1'-naphthalene]-2',2',4'-tricarbonitrile (3d):** white solid. Yield

0.25 g (65%); mp 251–253 °C; <sup>1</sup>H NMR (300 MHz, DMSO-*d*<sub>6</sub>) δ 0.45 (q, *J* = 12.1 Hz, 1H), 1.39–1.74 (m, 3H), 1.82–2.01 (m, 1H), 2.08–2.25 (m, 1H), 2.71 (s, 3H, CH<sub>3</sub>), 2.99–3.12 (m, 1H), 5.95–6.05 (m, 1H), 7.03 (d, *J* = 7.3 Hz, 1H, Ar), 7.35 (t, *J* = 7.3 Hz, 1H, Ar), 7.56 (d, *J* = 7.7 Hz, 1H, Ar), 7.64 (s, 2H, NH<sub>2</sub>), 8.24 (d, *J* = 8.0 Hz, 1H, Ar) ppm; <sup>13</sup>C NMR (75 MHz, DMSO-*d*<sub>6</sub>) δ 20.1, 23.4, 24.5, 26.6, 38.1, 42.5, 55.3, 81.8, 109.8, 110.4, 115.3, 116.2, 121.3, 124.5, 124.7, 124.8, 126.3, 131.3, 140.6, 141.6, 170.1, 173.4 ppm; IR (KBr): ν = 3391, 3329, 3223, 2943, 2220, 1756, 1736, 1658, 1593, 1265 cm<sup>-1</sup>; MS (EI): *m/z* (%) = 383 ([M]<sup>+</sup>, 8), 341 (10), 285 (4), 133 (9), 43 (100). Anal. calcd (%) for C<sub>22</sub>H<sub>27</sub>N<sub>5</sub>O<sub>2</sub>: C 68.92, H 4.47, N 18.27. Found (%): C 68.79, H 4.58, N 18.01.

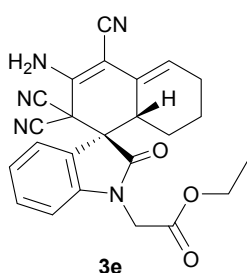

**(3*R*\*,8*a*'*R*\*) Ethyl (3'-amino-2',2',4'-tricyano-2-oxo-6',7',8',8*a*'-tetrahydro-2'*H*-spiro[indole-3,1'-naphthalen]-1(2*H*)-yl)acetate (3e):** white solid. Yield 0.26 g (62%); mp 229–230 °C; <sup>1</sup>H NMR (300 MHz, DMSO-*d*<sub>6</sub>) δ 0.44 (q, *J* = 12.1 Hz, 1H), 1.19 (t, *J* = 7.0 Hz, 3H, CH<sub>3</sub>), 1.38–1.55 (m, 1H), 1.55–1.70 (m, 2H), 1.82–2.01 (m, 1H), 2.07–2.25 (m, 1H), 2.89–3.03 (m, 1H), 4.16 (q, *J* = 7.0 Hz, 2H, CH<sub>2</sub>), 4.67–4.83 (m, 2H, CH<sub>2</sub>), 5.90–6.00 (m, 1H), 6.95 (d, *J* = 7.7 Hz, 1H, Ar), 7.17 (t, *J* = 7.7 Hz, 1H, Ar), 7.24 (d, *J* = 7.7 Hz, 1H, Ar), 7.46 (t, *J* = 7.7 Hz, 1H, Ar), 7.56 (s, 2H, NH<sub>2</sub>) ppm; <sup>13</sup>C NMR (75 MHz, DMSO-*d*<sub>6</sub>) δ 14.0, 20.2, 23.4, 24.6, 37.3, 41.5, 42.1, 54.0, 61.4, 81.8, 109.8, 109.9, 110.5, 115.5, 121.7, 123.9, 124.0, 124.8, 125.3, 130.9, 142.1, 143.2, 167.0, 171.9 ppm; IR (KBr): ν = 3324, 3219, 2940, 2216, 1758, 1727, 1645, 1373, 1207 cm<sup>-1</sup>; MS (EI): *m/z* (%) = 427 ([M]<sup>+</sup>, 68), 353 (92), 336 (38), 243 (18), 208 (22), 117 (71), 29 (100). Anal. calcd (%) for C<sub>24</sub>H<sub>21</sub>N<sub>5</sub>O<sub>3</sub>: C 67.44, H 4.95, N 16.38. Found (%): C 67.21, H 5.07, N 16.19.

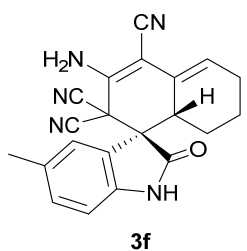

**(3*R*\*,8*a*'*R*\*)-3'-Amino-5-methyl-2-oxo-1,2,6',7',8',8*a*'-hexahydro-2'*H*-spiro[indole-3,1'-naphthalene]-2',2',4'-tricarbonitrile (3f):** white solid. Yield 0.24 g (68%); mp 259–262 °C; <sup>1</sup>H NMR (300 MHz, DMSO-*d*<sub>6</sub>) δ 0.48 (q, *J* = 12.1 Hz, 1H), 1.37–1.71 (m, 3H), 1.83–2.03 (m, 1H), 2.08–2.21 (m, 1H), 2.31 (s, 3H, CH<sub>3</sub>), 2.83–2.95 (m, 1H), 5.88–5.98 (m, 1H), 6.65 (s, 1H, Ar), 6.90 (d, *J* = 8.0 Hz, 1H, Ar), 7.19 (d, *J* = 8.0 Hz, 1H, Ar), 7.51 (s, 2H, NH<sub>2</sub>), 11.26 (s, 1H, NH) ppm; <sup>13</sup>C NMR (75 MHz, DMSO-*d*<sub>6</sub>) δ 20.2, 21.0, 23.4, 24.5, 37.0, 42.2, 54.6, 81.6, 110.3, 110.5, 110.7, 115.5, 122.6, 123.6, 125.3, 125.5, 131.2, 131.6, 140.5, 142.3, 173.2 ppm; IR (KBr): ν = 3337, 3224, 2928, 2214, 1723, 1644, 1598, 1490 cm<sup>-1</sup>; MS (EI): *m/z* (%) = 355 ([M]<sup>+</sup>, 100), 209 (15), 146 (52), 115 (23), 77 (51), 39 (78). Anal. calcd (%) for C<sub>21</sub>H<sub>17</sub>N<sub>5</sub>O: C 70.97, H 4.82, N 19.71. Found (%): C 70.74, H 4.93, N 19.59.

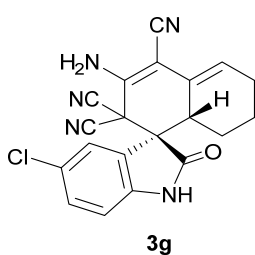

**3g**

**(3R\*,8a'R\*)-3'-Amino-5-chloro-2-oxo-1,2,6',7',8',8a'-hexahydro-2'H-spiro[indole-3,1'-naphthalene]-2',2',4'-tricarbonitrile (3g):** white solid.

Yield 0.23 g (61%); mp 232–234 °C; <sup>1</sup>H NMR (300 MHz, DMSO-*d*<sub>6</sub>) δ 0.49 (q, *J* = 12.1 Hz, 1H), 1.37–1.77 (m, 3H), 1.88–2.07 (m, 1H), 2.07–2.32 (m, 1H), 2.86–3.01 (m, 1H), 5.92–6.03 (m, 1H), 6.78 (s, 1H, Ar), 7.06 (d, *J* = 8.4 Hz, 1H, Ar), 7.49 (d, *J* = 8.4 Hz, 1H, Ar), 7.64 (s, 2H, NH<sub>2</sub>), 11.58 (s, 1H, NH) ppm; <sup>13</sup>C NMR (75 MHz, DMSO-*d*<sub>6</sub>) δ 20.2, 23.4, 24.5, 37.0, 42.0, 54.8, 81.5, 110.1, 110.3, 112.4, 115.3, 124.3, 124.4, 124.7, 124.9, 126.7, 131.0, 142.0 (2C), 172.9 ppm; IR (KBr): ν = 3335, 3221, 2941, 2216, 1726, 1642, 1599, 1476 cm<sup>-1</sup>; MS (EI): *m/z* (%) = 377 ([M]<sup>+</sup>, 17), 375 (58) [M]<sup>+</sup>, 169 (23), 167 (100), 102 (23), 77 (38), 41 (70). Anal. calcd (%) for C<sub>20</sub>H<sub>14</sub>ClN<sub>5</sub>O: C 63.92, H 3.75, Cl 9.43, N 18.64. Found (%): C 63.78, H 3.91, Cl 9.31, N 18.47.

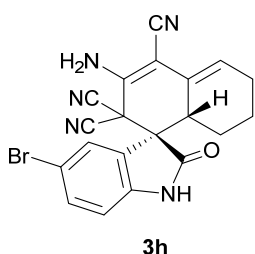

**3h**

**(3R\*,8a'R\*)-3'-Amino-5-bromo-2-oxo-1,2,6',7',8',8a'-hexahydro-2'H-spiro[indole-3,1'-naphthalene]-2',2',4'-tricarbonitrile (3h):** white solid.

Yield 0.26 g (63%); mp 242–245 °C; <sup>1</sup>H NMR (300 MHz, DMSO-*d*<sub>6</sub>) δ 0.49 (q, *J* = 12.1 Hz, 1H), 1.38–1.76 (m, 3H), 1.88–2.06 (m, 1H), 2.09–2.31 (m, 1H), 2.87–3.00 (m, 1H), 5.92–6.03 (m, 1H), 6.90 (s, 1H, Ar), 7.01 (d, *J* = 8.4 Hz, 1H, Ar), 7.56–7.70 (m, 3H, Ar, NH<sub>2</sub>), 11.58 (s, 1H, NH) ppm; <sup>13</sup>C NMR (75 MHz, DMSO-*d*<sub>6</sub>) δ 20.2, 23.4, 24.5, 37.0, 42.0, 54.7, 81.4, 110.1, 110.3, 112.8, 114.3, 115.3, 124.3, 124.7, 124.9, 127.4, 133.9, 142.0, 142.4, 172.8 ppm; IR (KBr): ν = 3335, 3220, 2941, 2215, 1725, 1643, 1599, 1472 cm<sup>-1</sup>; MS (EI): *m/z* (%) = 421 ([M]<sup>+</sup>, 18), 419 ([M]<sup>+</sup>, 17), 213 (21), 211 (19), 115 (28), 77 (61), 41 (90), 39 (100); Anal. calcd (%) for C<sub>20</sub>H<sub>14</sub>BrN<sub>5</sub>O: C 57.16, H 3.36, Br 19.01, N 16.66. Found (%): C 56.97, H 3.48, Br 18.82, N 16.43.

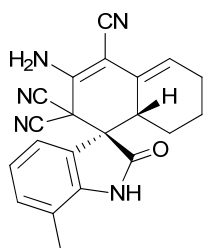

**3i**

**(3R\*,8a'R\*)-3'-Amino-7-methyl-2-oxo-1,2,6',7',8',8a'-hexahydro-2'H-spiro[indole-3,1'-naphthalene]-2',2',4'-tricarbonitrile (3i):** white solid.

Yield 0.21 g (60%); mp 263–268 °C; <sup>1</sup>H NMR (300 MHz, DMSO-*d*<sub>6</sub>) δ 0.51 (q, *J* = 10.8 Hz, 1H), 1.47–1.64 (m, 3H), 1.87–1.92 (m, 1H), 2.13–2.20 (m, 1H), 2.90–2.93 (m, 1H), 2.26 (s, 3H, CH<sub>3</sub>), 5.90–5.92 (m, 1H), 6.72 (d, *J* = 7.6 Hz, 1H, Ar), 6.99 (t, *J* = 7.7 Hz, 1H, Ar), 7.22 (d, *J* = 7.7 Hz, 1H, Ar), 7.54 (s, 2H, NH<sub>2</sub>), 11.41 (s, 1H, NH) ppm; <sup>13</sup>C NMR (75 MHz, DMSO-*d*<sub>6</sub>): 16.5, 20.2, 23.5, 24.5, 37.1, 42.2, 54.7, 81.6, 110.2, 110.8, 115.5, 120.1, 122.2 (2C), 122.8, 123.6, 125.5, 132.1, 141.4, 142.3, 173.8 ppm; IR (KBr): ν = 3445, 3317, 3218, 2224, 1742, 1719, 1647, 1599, 1462, 1395 cm<sup>-1</sup>; MS (EI): *m/z* (%) = 355 ([M]<sup>+</sup>, 46), 297 (66), 254 (25), 184 (19), 151 (95), 128 (28), 115 (20), 91 (28), 65 (31), 15 (100); Anal. calcd (%) for C<sub>21</sub>H<sub>17</sub>N<sub>5</sub>O: C 70.97, H 4.82, N 19.71. Found (%): C 70.85, H 4.93, N 19.60.

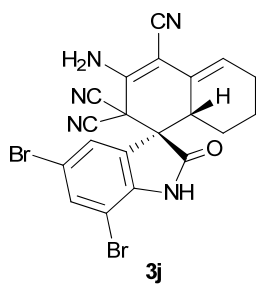

**(3R\*,8a'R\*)-3'-Amino-5,7-dibromo-2-oxo-1,2,6',7',8',8a'-hexahydro-2'H-spiro[indole-3,1'-naphthalene]-2',2',4'-tricarbonitrile (3j):** white solid. Yield 0.40 g (81%); mp 304–309 °C; <sup>1</sup>H NMR (300 MHz, DMSO-*d*<sub>6</sub>) δ 0.54 (q, *J* = 11.4 Hz, 1H), 1.49–1.66 (m, 3H), 1.99–2.01 (m, 1H), 2.15–2.21 (m, 1H), 2.94–2.98 (m, 1H), 5.97–6.00 (m, 1H), 6.89 (s, 1H, Ar), 7.70 (s, 2H, NH<sub>2</sub>), 7.96 (s, 1H, Ar), 11.99 (s, 1H, NH); <sup>13</sup>C NMR (75 MHz, DMSO-*d*<sub>6</sub>): 21.1, 24.5, 25.5, 38.1, 43.0, 56.6, 82.5, 105.3, 110.9, 111.0, 115.8, 116.2, 125.6, 125.7, 126.7, 127.6, 137.0, 142.7, 143.2, 173.8 ppm; IR (KBr): ν = 3443, 3347, 2221, 1747, 1633, 1622, 1457, 1392, 1296, 1163 cm<sup>-1</sup>; MS (EI): *m/z* (%) = 501 ([M]<sup>+</sup>, 9), 499 ([M]<sup>+</sup>, 13), 391 (3), 291 (10), 209 (20), 184 (18), 128 (22), 114 (18), 77 (23), 27 (100); Anal. calcd (%) for C<sub>20</sub>H<sub>13</sub>Br<sub>2</sub>N<sub>5</sub>O: C 48.12, H 2.63, N 14.03, Br 32.02. Found (%): C 48.03, H 2.71, N 13.95, Br 31.95.

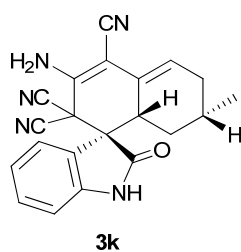

**(3R\*,7'R\*,8a'R\*)-3'-Amino-7'-methyl-2-oxo-1,2,6',7',8',8a'-hexahydro-2'H-spiro[indole-3,1'-naphthalene]-2',2',4'-tricarbonitrile (3k):** white solid. Yield 0.24 g (68%); mp 219–222 °C; <sup>1</sup>H NMR (300 MHz, DMSO-*d*<sub>6</sub>) δ 0.24 (q, *J* = 11.4 Hz, 1H), 0.79 (d, *J* = 6.3 Hz, 3H, CH<sub>3</sub>), 1.40–1.60 (m, 2H), 1.63–1.80 (m, 1H), 2.16–2.30 (m, 1H), 2.92–3.04 (m, 1H), 5.85–5.94 (m, 1H), 6.86 (d, *J* = 7.3, 1H, Ar), 7.01 (d, *J* = 7.7 Hz, 1H, Ar), 7.06 (t, *J* = 7.7 Hz, 1H, Ar), 7.38 (t, *J* = 7.7 Hz, 1H, Ar), 7.54 (s, 2H, NH<sub>2</sub>), 11.35 (s, 1H, NH) ppm; <sup>13</sup>C NMR (75 MHz, DMSO-*d*<sub>6</sub>) δ 21.5, 27.2, 31.7, 33.4, 37.6, 42.3, 54.5, 81.5, 110.2, 110.6, 110.7, 115.6, 122.4, 123.0, 123.5, 125.0, 125.3, 130.9, 142.4, 142.9, 173.2 ppm; IR (KBr): ν = 3363, 3284, 2959, 2222, 1739, 1710, 1639, 1594, 1473 cm<sup>-1</sup>; MS (EI): *m/z* (%) = 355 ([M]<sup>+</sup>, 100), 313 (21), 285 (17), 133 (41), 115 (20), 77 (25), 46 (64), 31 (88). Anal. calcd (%) for C<sub>21</sub>H<sub>17</sub>N<sub>5</sub>O: C 70.97, H 4.82, N 19.71. Found (%): C 70.78, H 4.98, N 19.57.

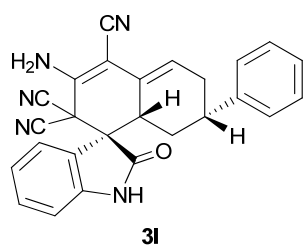

**(3R\*,7'R\*,8a'R\*)-3'-Amino-2-oxo-7'-phenyl-1,2,6',7',8',8a'-hexahydro-2'H-spiro[indole-3,1'-naphthalene]-2',2',4'-tricarbonitrile (3l):** white solid. Yield 0.30 g (72%); mp 284–286 °C; <sup>1</sup>H NMR (300 MHz, DMSO-*d*<sub>6</sub>) δ 0.74 (q, *J* = 12.4 Hz, 1H), 1.53–1.67 (m, 1H), 2.00–2.17 (m, 1H), 2.33–2.49 (m, 1H), 2.89–3.06 (m, 1H), 3.13–3.28 (m, 1H), 5.95–6.08 (m, 1H), 6.94 (d, *J* = 7.7, 1H, Ar), 6.97–7.30 (m, 7H, Ar), 7.40 (t, *J* = 7.3 Hz, 1H, Ar), 7.63 (s, 2H, NH<sub>2</sub>), 11.32 (s, 1H, NH) ppm; <sup>13</sup>C NMR (75 MHz, DMSO-*d*<sub>6</sub>) δ 31.2, 32.6, 37.8, 37.9, 42.2, 54.5, 81.2, 110.1, 110.6, 110.8, 115.5, 122.3, 123.1, 123.3, 125.0, 125.3, 126.4, 126.5 (2C), 128.5 (2C), 131.0, 142.6, 142.8, 142.9, 173.1 ppm; IR (KBr): ν = 3421, 3331, 3223, 2918, 2212, 1724, 1649, 1597, 1471 cm<sup>-1</sup>; MS (EI): *m/z* (%) = 417 ([M]<sup>+</sup>, 85), 313 (28), 285

(19), 115 (23), 104 (73), 91 (100), 77 (55), 44 (40). Anal. calcd (%) for C<sub>26</sub>H<sub>19</sub>N<sub>5</sub>O: C 74.80, H 4.59, N 16.78. Found (%): C 74.61, H 4.72, N 16.59.

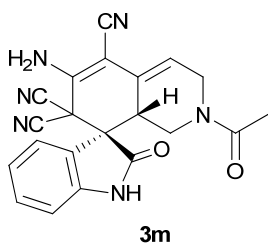

**(3R\*,8a'R\*)-2'-Acetyl-6'-amino-2-oxo-1,1',2,2',3',8a'-hexahydro-7'H-spiro[indole-3,8'-isoquinoline]-5',7',7'-tricarbonitrile (3m):** white solid. Yield 0.25 g (66%); mp 226–227 °C; <sup>1</sup>H NMR (300 MHz, DMSO-*d*<sub>6</sub>) δ 1.59 (t, *J* = 11.0 Hz, 1H), 1.96 (s, 3H, CH<sub>3</sub>), 2.88–3.00 (m, 1H), 3.77–3.91 (m, 1H), 4.20–4.40 (m, 2H), 5.82–5.92 (m, 1H), 6.93 (d, *J* = 7.3 Hz, 1H, Ar), 7.01–7.16 (m, 2H, Ar), 7.41 (t, *J* = 7.7 Hz, 1H, Ar), 7.79 (s, 2H, NH<sub>2</sub>), 11.51 (s, 1H, NH) ppm; <sup>13</sup>C NMR (75 MHz, DMSO-*d*<sub>6</sub>) δ 21.5, 35.7, 37.7, 42.2, 44.9, 52.8, 80.0, 109.8, 110.3, 111.1, 115.2, 118.9, 121.4, 123.3, 124.6, 125.0, 131.3, 142.7, 143.3, 169.0, 172.5 ppm; IR (KBr): ν = 3624, 3498, 3328, 3149, 2210, 1729, 1648, 1600, 1472 cm<sup>-1</sup>; MS (EI): *m/z* (%) = 384 ([M]<sup>+</sup>, 5), 341 (6), 298 (8), 210 (10), 147 (12), 133 (13), 77 (5), 43 (100). Anal. calcd (%) for C<sub>21</sub>H<sub>16</sub>N<sub>6</sub>O<sub>2</sub>: C 65.62, H 4.20, N 21.86. Found (%): C 65.38, H 4.34, N 21.67.

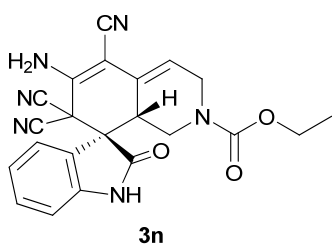

**(3R\*,8a'R\*)-Ethyl 6'-amino-5',7',7'-tricyano-2-oxo-1,1',2,3',7',8a'-hexahydro-2'H-spiro[indole-3,8'-isoquinoline]-2'-carboxylate (3n):** white solid. Yield 0.25 g (60%); mp 240 °C (dec); <sup>1</sup>H NMR (300 MHz, DMSO-*d*<sub>6</sub>) δ 1.15 (t, *J* = 7.3 Hz, 3H, CH<sub>3</sub>), 2.95–3.08 (m, 1H), 3.52–3.72 (m, 1H), 3.76–3.96 (m, 2H), 4.02 (q, *J* = 7.3 Hz, 2H, CH<sub>2</sub>), 4.22–4.38 (m, 1H), 5.82–5.93 (m, 1H), 6.92 (d, *J* = 7.3 Hz, 1H, Ar), 7.05 (d, *J* = 7.7 Hz, 1H, Ar), 7.10 (t, *J* = 7.7 Hz, 1H, Ar), 7.41 (t, *J* = 7.3 Hz, 1H, Ar), 7.78 (s, 2H, NH<sub>2</sub>), 11.53 (s, 1H, NH) ppm; <sup>13</sup>C NMR (75 MHz, DMSO-*d*<sub>6</sub>) δ 14.5, 35.7, 40.3, 42.2, 43.2, 52.6, 61.2, 80.1, 109.7, 110.2, 111.1, 115.1, 119.0, 121.4, 123.3, 124.2, 125.0, 131.3, 142.6, 143.2, 154.5, 172.5 ppm; IR (KBr): ν = 3430, 3224, 2213, 1728, 1688, 1646, 1600, 1470 cm<sup>-1</sup>; MS (EI): *m/z* (%) = 414 ([M]<sup>+</sup>, 4), 341 (3), 313 (5), 259 (8), 210 (12), 133 (16), 77 (8), 29 (100). Anal. calcd (%) for C<sub>22</sub>H<sub>18</sub>N<sub>6</sub>O<sub>3</sub>: C 63.76, H 4.38, N 20.28. Found (%): C 63.52, H 4.51, N 20.03.

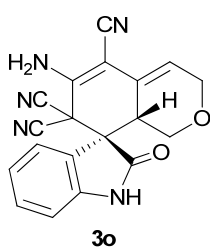

**(3R\*,8a'R\*)-6'-Amino-2-oxo-3',8a'-dihydrospiro[indoline-3,8'-isochromene]-5',7',7'(1'H)-tricarbonitrile (3o):** white solid. Yield 0.25 g (73%); mp 258–260 °C; <sup>1</sup>H NMR (300 MHz, DMSO-*d*<sub>6</sub>) δ 2.44–2.51 (m, 1H, CH), 3.07–3.15 (m, 1H, CH), 3.67–3.72 (m, 1H, CH), 4.00 (d, *J* = 17.7 Hz, 1H, CH), 4.21 (d, *J* = 17.7 Hz, 1H, CH), 5.91 (s, 1H, CH), 6.93 (d, *J* = 7.7 Hz, 1H, Ar), 7.03 (d, *J* = 7.7 Hz, 1H, Ar), 7.10 (t, *J* = 7.7 Hz, 1H, Ar), 7.41 (t, *J* = 7.7 Hz, 1H, Ar), 7.79 (s, 2H, NH<sub>2</sub>), 11.46 (s, 1H, NH) ppm; <sup>13</sup>C NMR (75 MHz, DMSO-*d*<sub>6</sub>) δ 35.4, 42.3, 51.9, 63.4, 65.3,

79.8, 109.7, 110.3, 111.0, 115.0, 120.4, 121.5, 123.2, 123.6, 124.9, 131.2, 142.5, 143.1, 172.3 ppm; MS (EI):  $m/z$  (%) = 343 ( $[M]^+$ , 100), 298 (38), 287 (35), 269 (24), 230 (19), 158 (43), 140 (85), 112 (65), 69 (36), 28 (58); IR (KBr):  $\nu$  = 3339, 3196, 2825, 2224, 1736, 1666, 1598, 1472, 1390, 1127  $\text{cm}^{-1}$ ; Anal. calcd (%) for  $\text{C}_{19}\text{H}_{13}\text{N}_5\text{O}_2$ : C 66.47, H 3.82, N 20.40. Found (%): C 66.31, H 3.99, N 20.19.

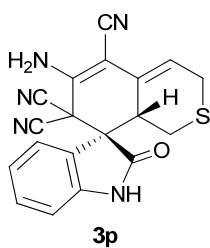

**(3*R*\*,8*a'**R*\*)-6'-Amino-2-oxo-3',8*a'*-dihydrospiro[indoline-3,8'-isothiochromene]-5',7',7'(1'*H*)-tricarbonitrile (3p)** white solid. Yield 0.28 g (77%); mp 181–183 °C;  $^1\text{H}$  NMR (300 MHz,  $\text{DMSO-}d_6$ )  $\delta$  1.71-1.79 (m, 1H, CH), 2.44-2.48 (m, 1H, CH), 3.11-3.19 (m, 2H), 3.38-3.44 (m, 1H, CH), 6.14 (s, 1H, CH), 6.90 (d,  $J$  = 7.6 Hz, 1H, Ar), 7.02-7.11 (m, 2H, Ar), 7.41 (t,  $J$  = 7.7 Hz, 1H, Ar), 7.71 (s, 2H,  $\text{NH}_2$ ), 11.50 (s, 1H, NH) ppm;  $^{13}\text{C}$  NMR (75 MHz,  $\text{DMSO-}d_6$ )  $\delta$  25.4, 25.5, 38.3, 42.9, 55.1, 82.2, 110.3, 111.0, 111.6, 115.9, 121.5, 122.0, 123.8, 125.6, 126.9, 131.8, 143.3, 143.4, 173.3; MS (EI):  $m/z$  (%) = 359 ( $[M]^+$ , 100), 326 (17), 258 (19), 298 (22), 230 (15), 195 (15), 164 (27), 133 (67), 77 (24), 45 (44); IR (KBr):  $\nu$  = 3337, 3213, 2213, 1722, 1640, 1619, 1599, 1472, 1330, 1238  $\text{cm}^{-1}$ ; Anal. calcd (%) for  $\text{C}_{19}\text{H}_{13}\text{N}_5\text{OS}$ : C 63.49, H 3.65, N 19.49, S 8.92. Found (%): C 63.30, H 3.81, N 19.32, S 8.79.

# <sup>1</sup>H-NMR for **3a**:

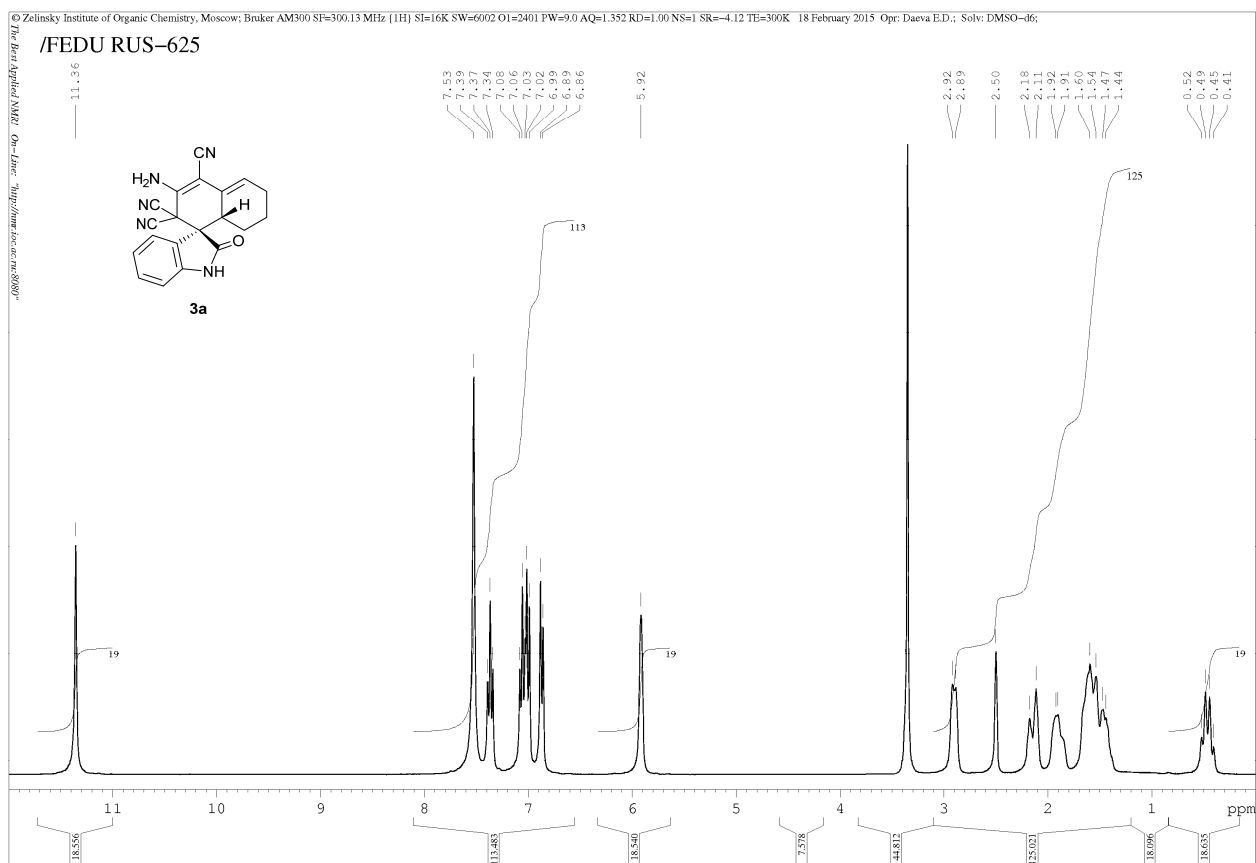

# <sup>13</sup>C-NMR for **3a**:

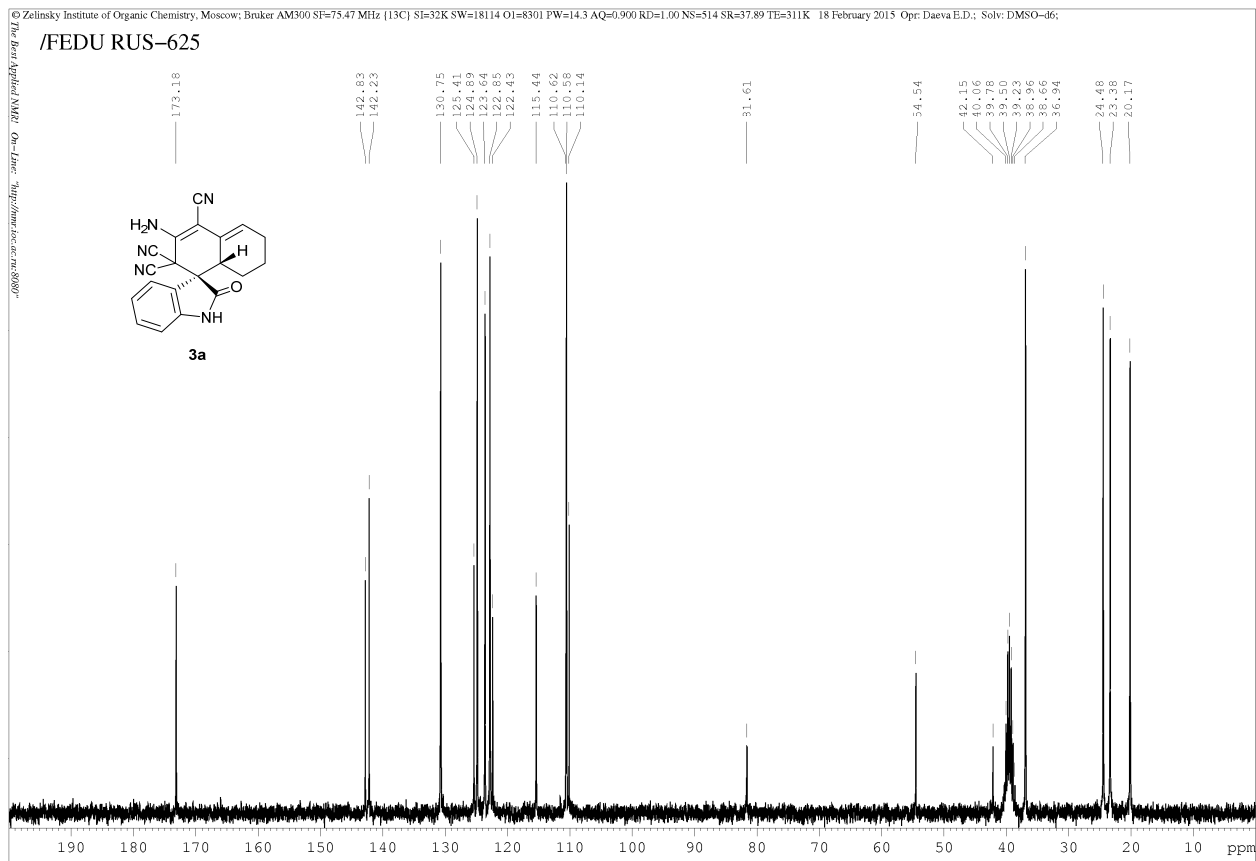



IR for **3a**:

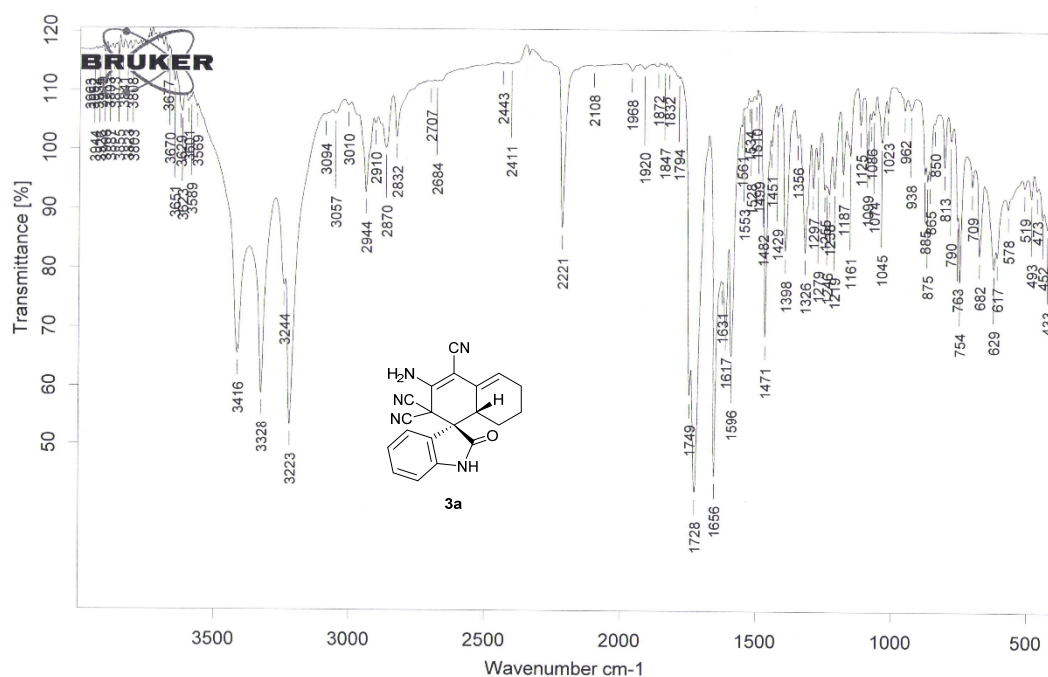

D:\EDLRUS-625.0 НАСЫБУЛЛИН. RUS-625 , прессовка с KBr, 1/200.

24.02.2015

# <sup>1</sup>H-NMR for 3i:

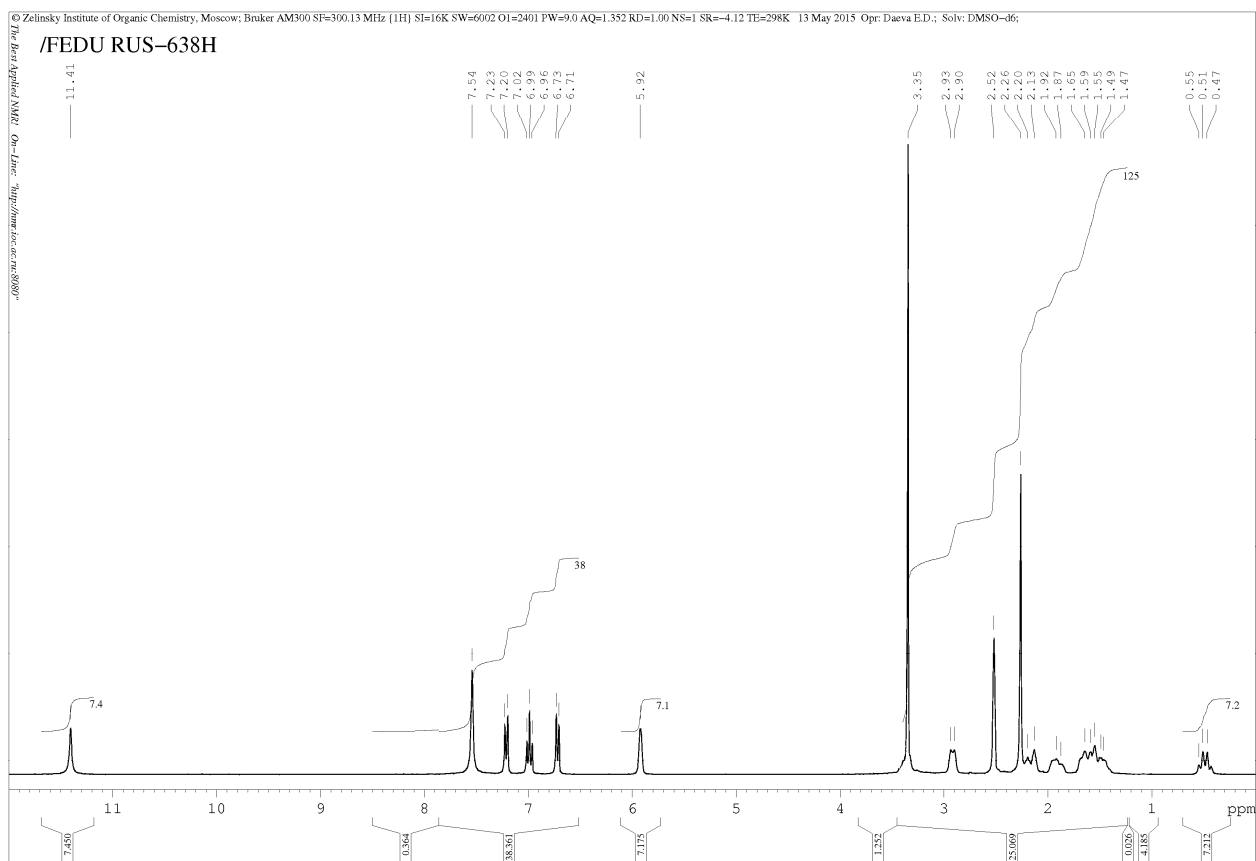

# <sup>13</sup>C-NMR for 3i:

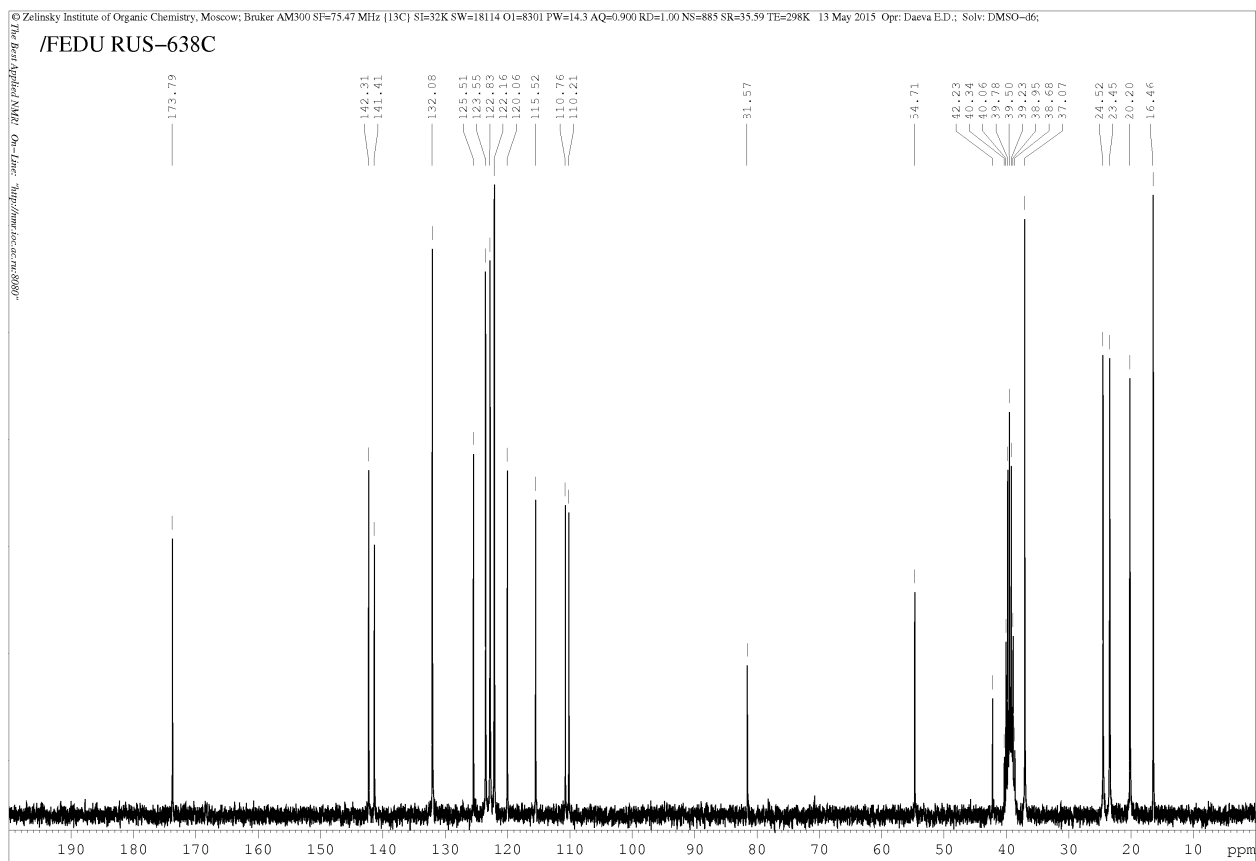

IR for 3i:

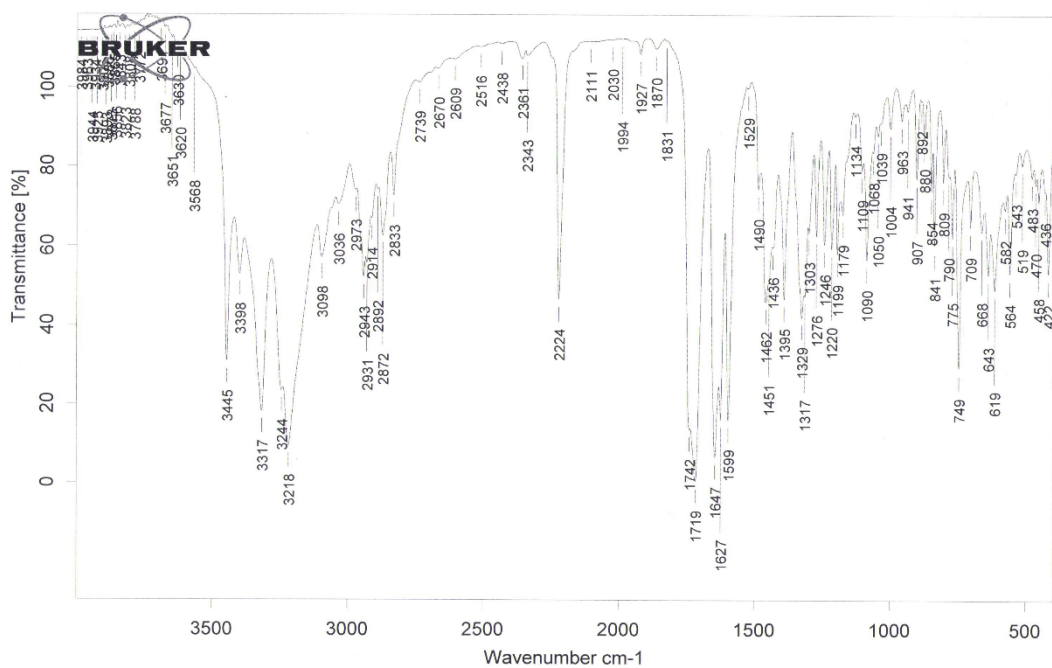

D:\EDL\RUS-638.0

РОЖКОВ. RUS-638 , прессовка с KBr.

13.05.2015

# <sup>1</sup>H-NMR for **3j**:

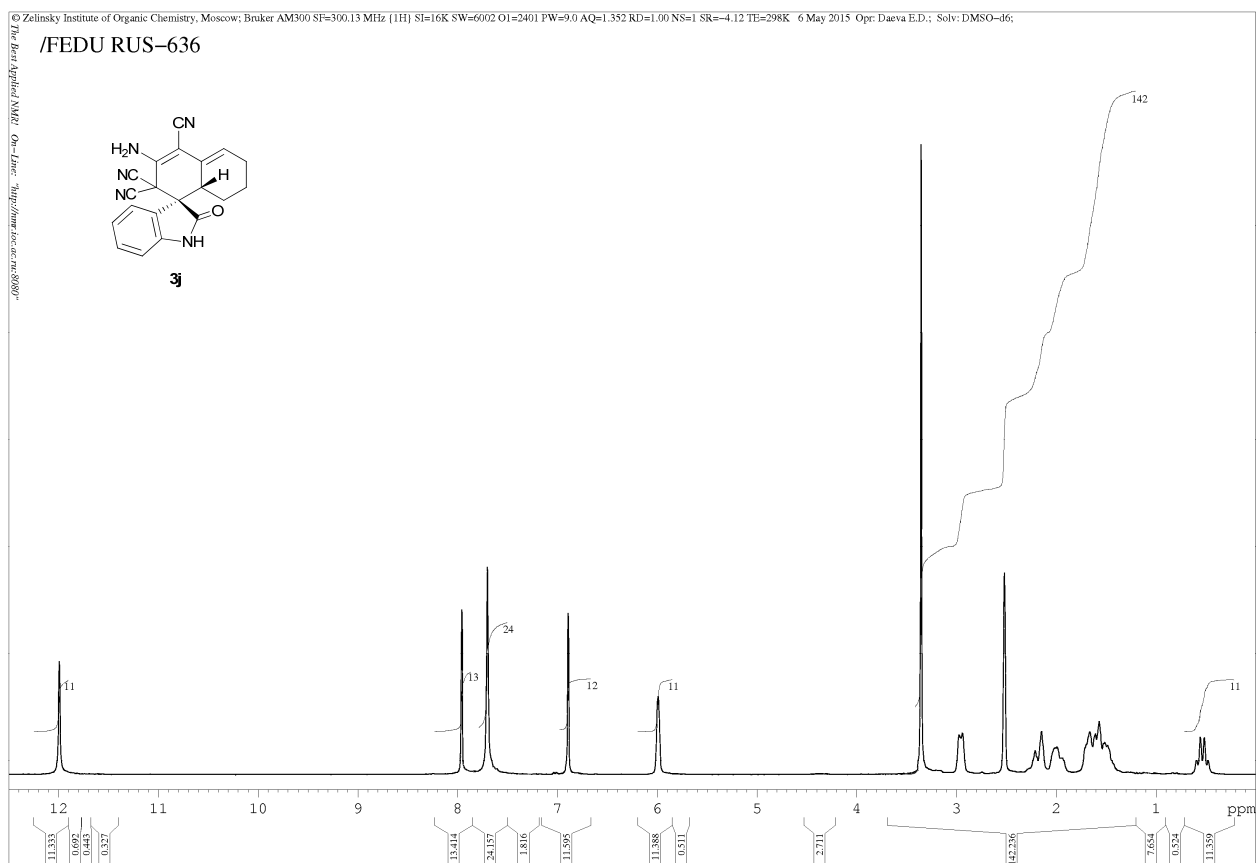

# <sup>13</sup>C-NMR for **3j**:

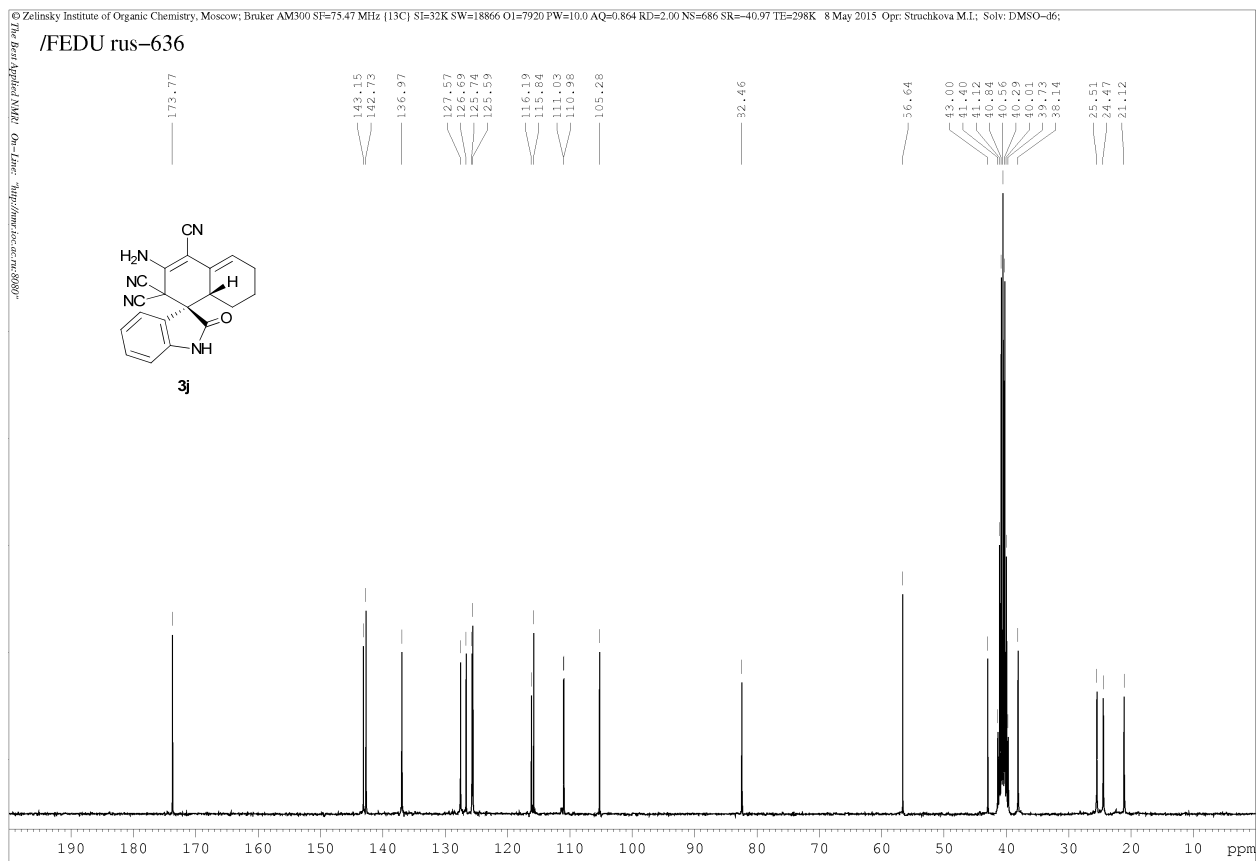

IR for **3j**:

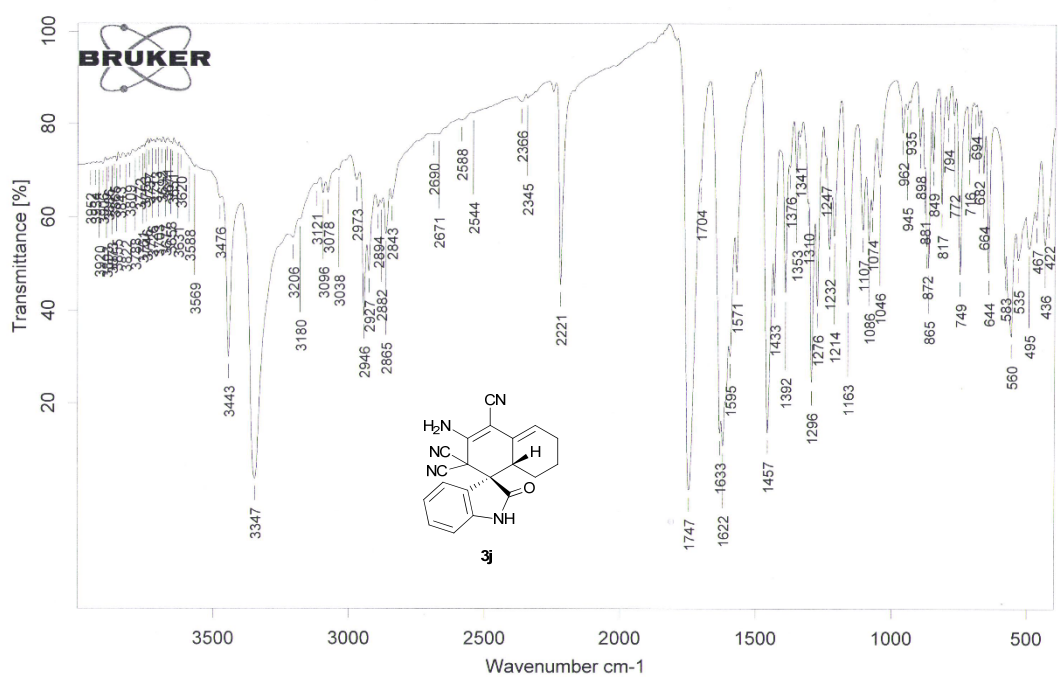

D:\EDL\RUS-636.0

РОЖКОВ. RUS-636 , прессовка с KBr.

13.05.2015

# <sup>1</sup>H-NMR for **3o**:

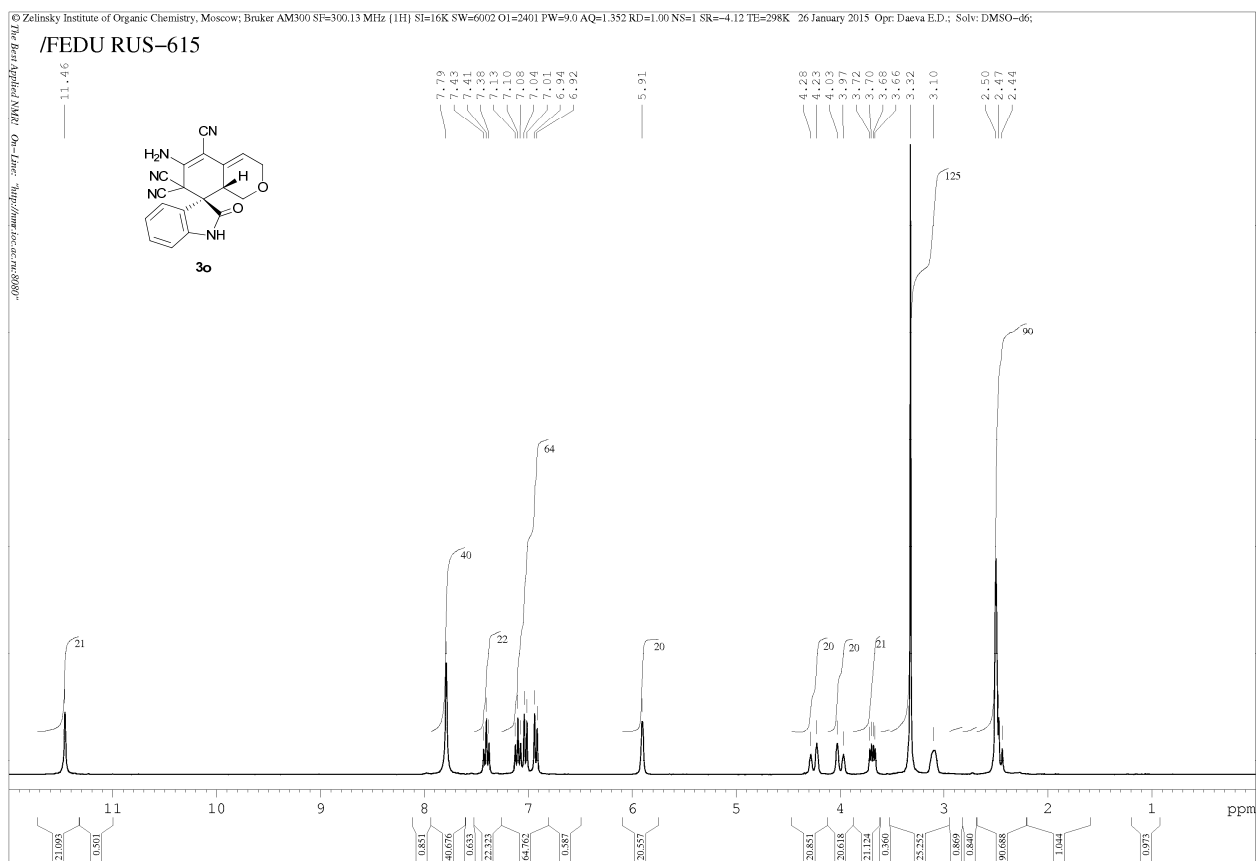

# <sup>13</sup>C-NMR for **3o**:

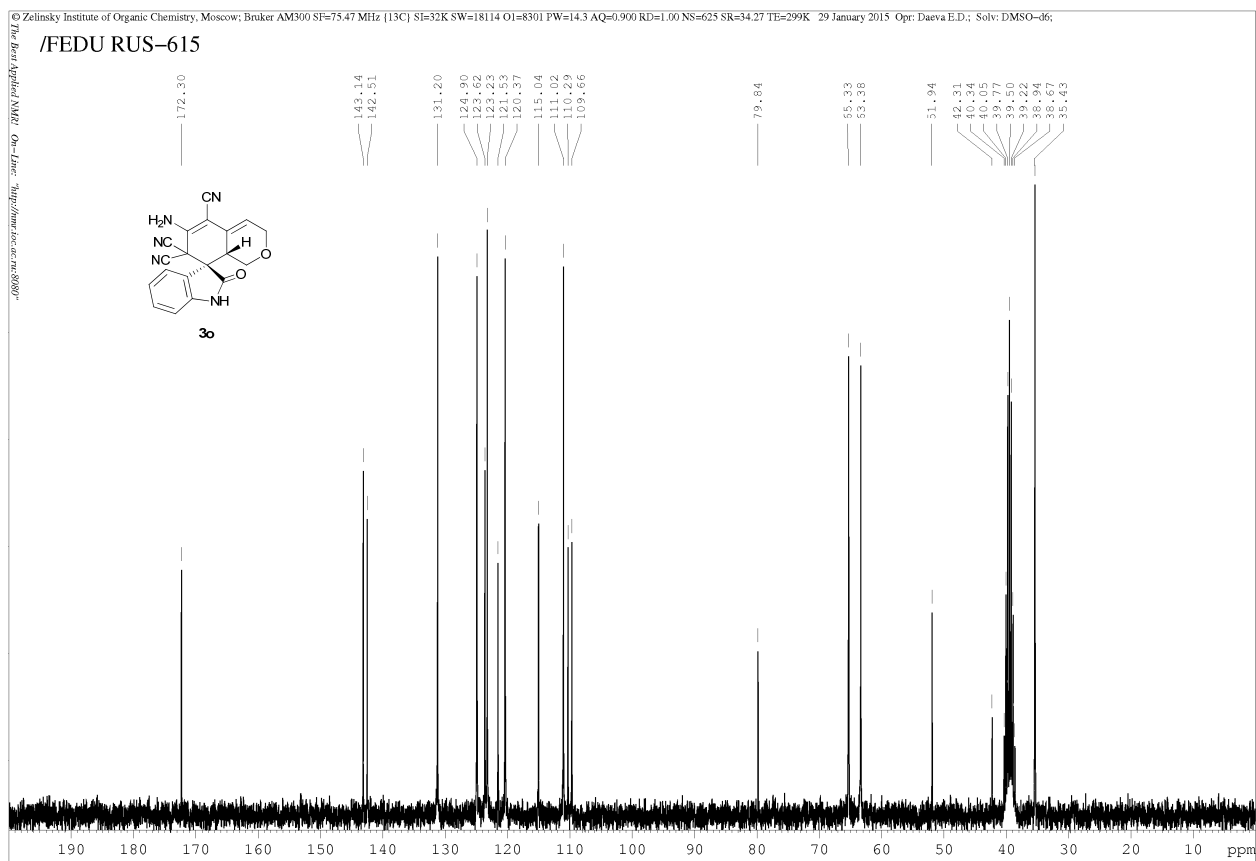

IR for **3o**:

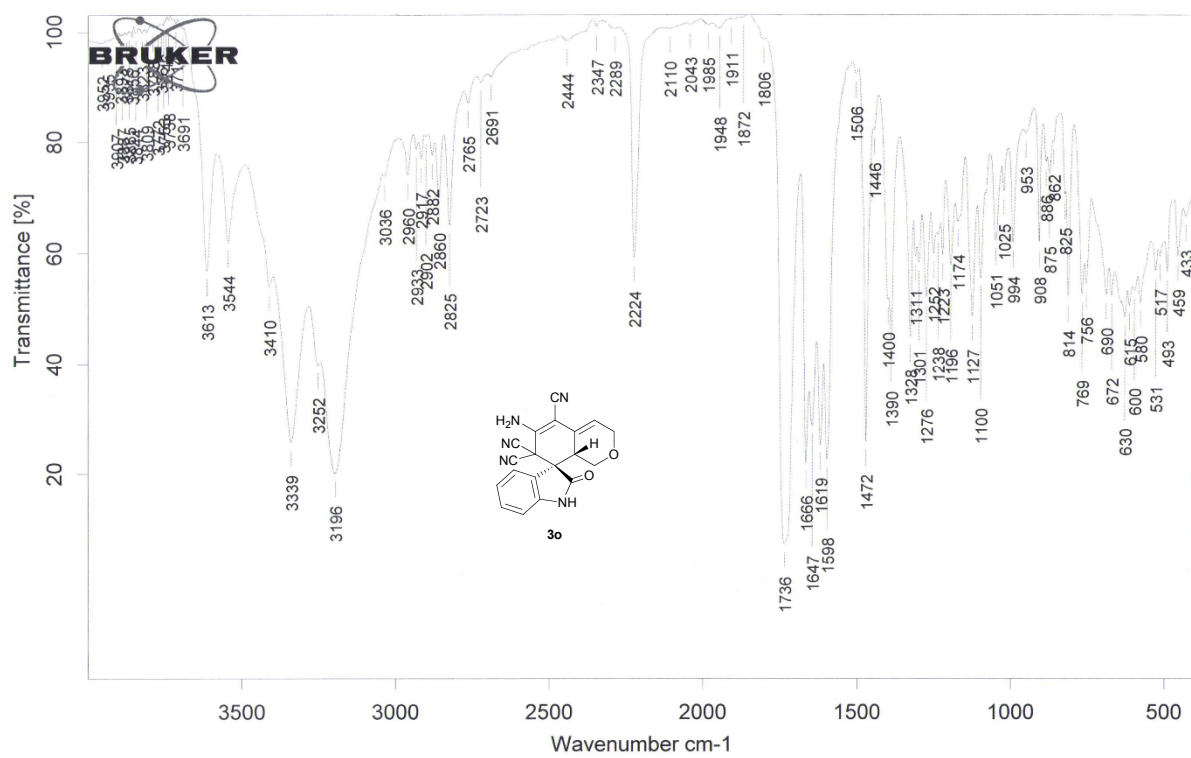

# <sup>1</sup>H-NMR for **3p**:

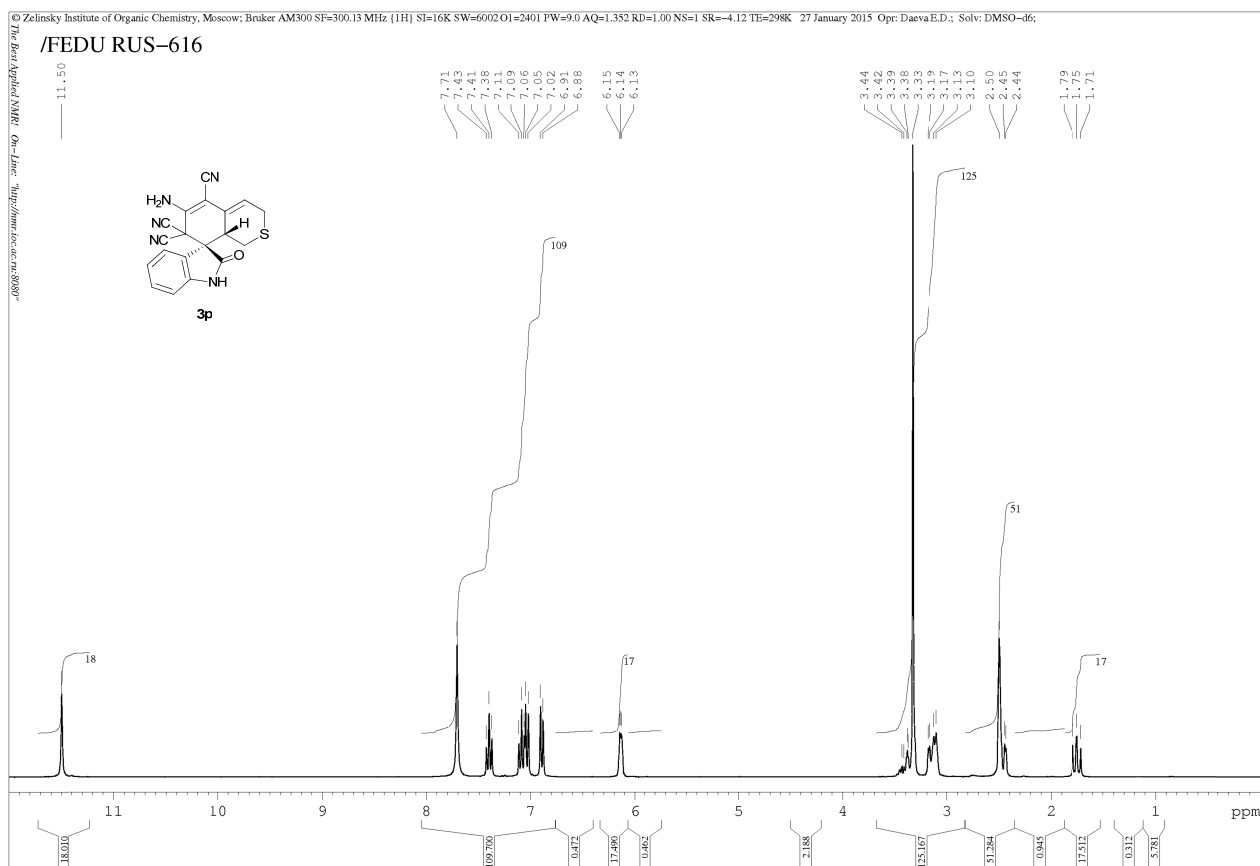

# <sup>13</sup>C-NMR for **3p**:

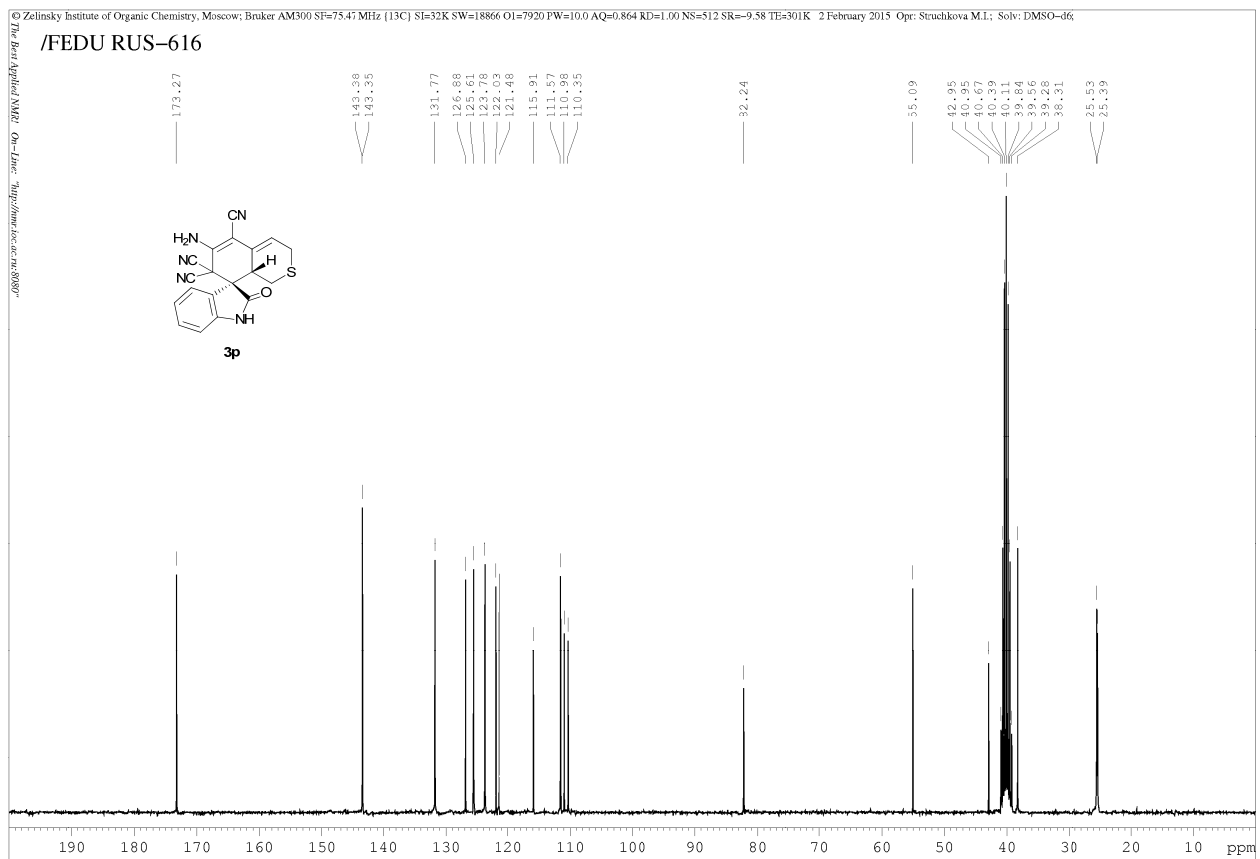



IR for **3p**:

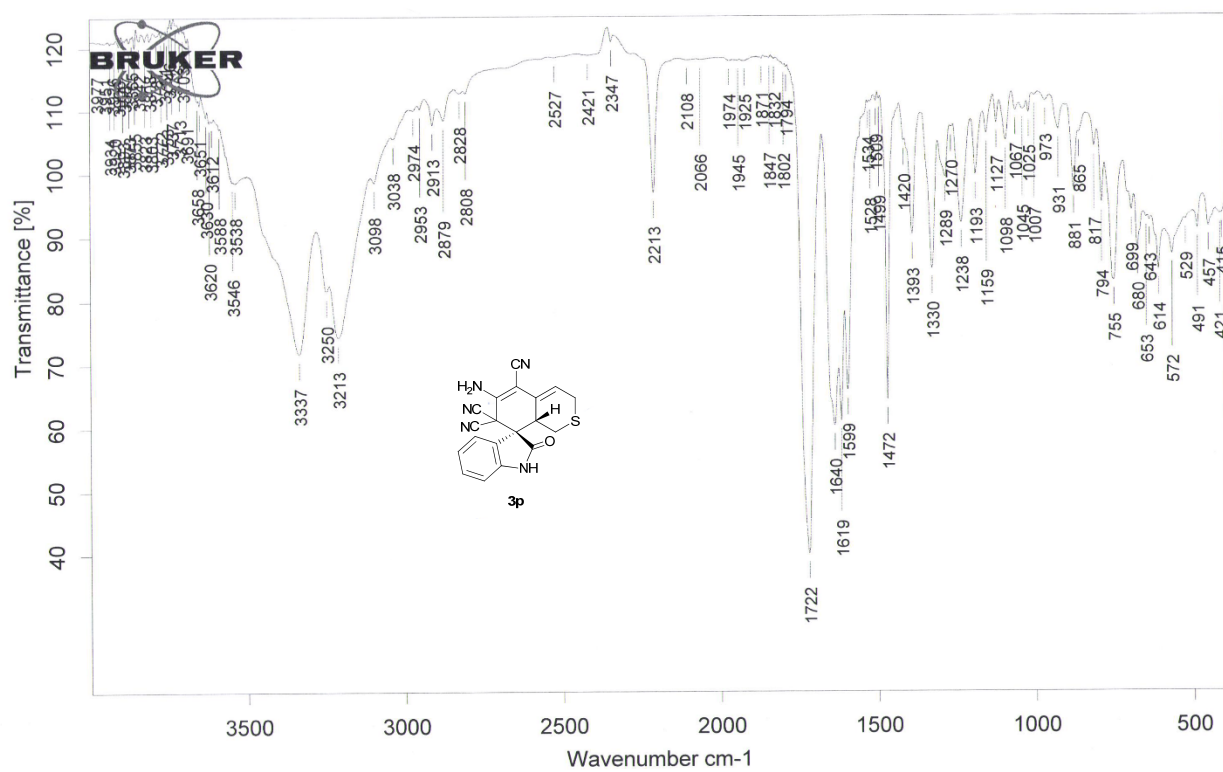

### 3. Single-crystal X-ray diffraction

Single crystals of  $C_{23}H_{24}N_5O_{2.5}$  (**3a**) were crystallized from EtOH. A suitable crystal was selected and mounted on a needle on a Bruker SMART 1000 diffractometer. The crystal was kept at 150 K during data collection. Using Olex2,<sup>1</sup> the structure was solved with the SHELXS<sup>2</sup> structure solution program using Direct Methods and refined with the SHELXL<sup>2</sup> refinement package using Least Squares minimization.

The crystal of **3a** contained two independent disordered EtOH moieties, one of them positioned around an inversion centre, resulting in a composition of  $C_{20}H_{15}N_5O \cdot 1.5EtOH$ . The disordered solvent molecules were refined using SAME and SIMU restraints as implemented in SHELXL 2014/7.

**Crystal Data** for  $C_{23}H_{24}N_5O_{2.5}$  ( $M=410.47$  g/mol): triclinic, space group P-1 (no. 2),  $a = 7.4809(18)$  Å,  $b = 11.265(3)$  Å,  $c = 13.576(3)$  Å,  $\alpha = 77.760(6)^\circ$ ,  $\beta = 83.288(7)^\circ$ ,  $\gamma = 70.811(6)^\circ$ ,  $V = 1054.6(4)$  Å<sup>3</sup>,  $Z = 2$ ,  $T = 150$  K,  $\mu(\text{MoK}\alpha) = 0.087$  mm<sup>-1</sup>,  $D_{\text{calc}} = 1.293$  g/cm<sup>3</sup>, 9729 reflections measured ( $3.074^\circ \leq 2\theta \leq 52.742^\circ$ ), 4309 unique ( $R_{\text{int}} = 0.0359$ ,  $R_{\text{sigma}} = 0.0575$ ) which were used in all calculations. The final  $R_1$  was 0.0631 ( $I > 2\sigma(I)$ ) and  $wR_2$  was 0.2092 (all data). The structure has been deposited with the CSD, deposition number CCDC 1050772.

1. O. V. Dolomanov, L. J. Bourhis, R. J. Gildea, J. A. K. Howard and H. Puschmann, *J. Appl. Cryst.*, 2009, **42**, 339–341.
2. G. Sheldrick, *Acta Cryst. Sect. A*, 2008, **64**, 112–122.
